# Supplementary material
Source: PubMed Central journal article supplement (PMC9310369)
Supplement: 41577_2022_760_MOESM1_ESM.pdf [file 41577_2022_760_MOESM1_ESM.pdf]

**Supplementary information**

---

**Mitochondrial control of inflammation**

---

In the format provided by the  
authors and unedited

Table 1 | Dysregulated mtDAMP signalling in disease\*

| Disease                       | DAMP                               | PRR          | Effect      | Mechanistic evidence | Patient data | Note(s)                                                                                                                                                                                                                                                                      | Ref. |
|-------------------------------|------------------------------------|--------------|-------------|----------------------|--------------|------------------------------------------------------------------------------------------------------------------------------------------------------------------------------------------------------------------------------------------------------------------------------|------|
| Acute kidney injury           | mtDNA                              | cGAS         | Detrimental | Yes                  | Yes          | Reduced inflammation and kidney injury driven by cisplatin in <i>Sting1</i> <sup>-/-</sup> mice                                                                                                                                                                              | 1    |
|                               | ROS                                | n.d.         | Detrimental | Yes                  | No           | Mitophagy inhibition imposed by <i>Pink1</i> and/or <i>Prkn</i> deletion aggravated ischemic kidney injury                                                                                                                                                                   | 2    |
| Acute liver failure           | mtDNA<br><i>N</i> -formyl peptides | cGAS<br>FPR1 | Detrimental | Yes                  | Yes          | Pathological FPR1 and TLR9 activation in mice and high circulating levels of mtDNA in both mice and patients                                                                                                                                                                 | 3    |
| Alzheimer's disease           | n.d.                               | n.d.         | Detrimental | Yes                  | Yes          | Impaired mitophagy due to cholesterol accumulation in mice and patients with Alzheimer's disease                                                                                                                                                                             | 4    |
|                               | ROS                                | NLRP3        | Detrimental | Yes                  | Yes          | Pharmacological mitophagy activation ameliorates biochemical and behavioural defects in nematodes and mice                                                                                                                                                                   | 5    |
| Amyotrophic lateral sclerosis | mtDNA                              | cGAS         | Detrimental | Yes                  | Yes          | mtDNA release mechanistically linked to biochemical marker of amyotrophic lateral sclerosis and increased cGAMP levels in spinal cord samples from patients                                                                                                                  | 6    |
| ARDS                          | mtDNA                              | NLRP3        | Detrimental | Yes                  | No           | Reduced lung injury in mice upon inhibition of mtDNA synthesis with metformin                                                                                                                                                                                                | 7    |
|                               | <i>N</i> -formyl peptides          | FPR1         | Detrimental | Yes                  | Yes          | High levels of <i>N</i> -formyl peptides in patients with ARDS and FPR1-dependent lung injury in mice                                                                                                                                                                        | 8    |
| Breast cancer                 | ATP                                | NLRP3        | Beneficial  | Yes                  | No           | Mechanistic link between ATP release by cancer cells and tumour-targeting immunity in mice, and correlation between loss-of-function <i>P2RX7</i> allele and poor disease outcome in patients                                                                                | 9    |
|                               | mtDNA                              | cGAS         | Beneficial  | Yes                  | Yes          | Cytosolic accumulation of mtDNA in irradiated cells (under tonic inhibition by autophagy) mechanistically linked to anticancer immunity in mice, and signature of autophagy proficiency correlated with limited type I interferon signalling and immunity in patient samples | 10   |
|                               | mtDNA                              | cGAS         | Beneficial  | Partial              | Yes          | Apoptotic caspase activation in cancer cells mechanistically linked to poor type I interferon signalling in mice, and signatures of apoptotic proficiency correlated with poor disease outcome in patients                                                                   | 11   |
| Chronic kidney disease        | mtDNA                              | cGAS         | Detrimental | Yes                  | Yes          | <i>Tfam</i> deletion from renal tubules is sufficient to drive kidney injury upon mitochondrial dysfunction                                                                                                                                                                  | 12   |
| Colorectal cancer             | ATP                                | n.d.         | Beneficial  | Yes                  | No           | Mechanistic link between autophagy activation in dying cancer cells and ATP release driving anticancer immunity in mice                                                                                                                                                      | 13   |
|                               | mtDNA                              | cGAS         | Beneficial  | Yes                  | No           | CASP9 activation linked to inhibited mtDNA-driven cGAS signalling in cancer cells and consequent antitumour immunity in mice                                                                                                                                                 | 14   |
|                               | n.d.                               | n.d.         | Beneficial  | Yes                  | No           | Activation of apoptotic caspases linked to inhibition of MOMP-elicited NF-κB-dependent tumour-targeting immunity in mice                                                                                                                                                     | 15   |

|                                  |              |               |             |         |         |                                                                                                                                  |    |
|----------------------------------|--------------|---------------|-------------|---------|---------|----------------------------------------------------------------------------------------------------------------------------------|----|
| COPD                             | mtDNA        | cGAS<br>NLRP3 | Detrimental | Partial | Yes     | Increased circulating levels of mtDNA in patients with COPD and mice exposed to cigarette smoke                                  | 16 |
|                                  | ROS          | n.d.          | Detrimental | Yes     | Yes     | Signs of mitochondrial dysfunction in mice exposed to ozone and patients with COPD                                               | 17 |
| Crohn's disease                  | n.d.         | n.d.          | Detrimental | Yes     | Yes     | Genetic inactivation of mitophagy promotes mitochondrial defects and Paneth cell dysfunction                                     | 18 |
|                                  | ROS          | NLRP3         | Detrimental | Yes     | No      | Genetic inactivation of mitophagy promotes mitochondrial dysfunction and ROS generation                                          | 19 |
| Diabetic nephropathy             | ROS          | NLRP3         | Detrimental | No      | Yes     | Reduced OPTN levels in patients, negatively correlating with inflammatory markers in urine                                       | 20 |
| Flu                              | mtDNA        | cGAS          | Beneficial  | Yes     | No      | Virus-driven MAVS-dependent mtDNA release ignites antiviral type I interferon responses via cGAS                                 | 21 |
| <i>H. pylori</i> infection       | SMAC         | NIK           | Detrimental | No      | Partial | Correlation between SMAC levels and signs of inflammation in biopsies from patients with gastritis positive for <i>H. pylori</i> | 22 |
| Heart failure                    | mtDNA        | TLR9          | Detrimental | Yes     | No      | Defective autophagic clearance of mtDNA exacerbates pressure overload-driven myocarditis                                         | 23 |
| Hepatocellular carcinoma         | mtDNA        | TLR9          | Detrimental | Yes     | Yes     | Mitochondrial fission mechanistically linked to TLR9-dependent CCL2 secretion and establishment of immunosuppression in mice     | 24 |
|                                  | mtDNA        | TLR9          | Detrimental | Partial | Yes     | HMGB1-bound mtDNA mechanistically linked to TLR9-dependent cancer cell proliferation driven by hypoxia in immunodeficient mice   | 25 |
| Interstitial lung disease        | mtDNA<br>ROS | cGAS<br>NLRP3 | Detrimental | Yes     | Yes     | Increased dsDNA in sputum and STING activation in lungs from patients with silicosis                                             | 26 |
| Intracerebral haemorrhage        | Haem         | TLR4          | Detrimental | Partial | No      | Evidence of a TLR4-dependent pathogenic mechanism driven by haemorrhage and aggravated by exogenous haemin administration        | 27 |
| Lowe syndrome                    | mtDNA        | TLR9          | Detrimental | No      | Yes     | Mitophagy defects in cells from patients with Lowe syndromes bearing <i>OCRL</i> mutations                                       | 28 |
| Melanoma                         | ROS          | n.d.          | Detrimental | Partial | No      | Mitochondrial dysfunction linked to ROS-driven pro-inflammatory cytokine secretion in support of cancer immunoevasion in mice    | 29 |
| Nonalcoholic fatty liver disease | mtDNA        | AIM2          | Detrimental | Yes     | No      | Pathological AIM signalling in mice exposed to a high-fat diet, correlating with mitochondrial dysfunction                       | 30 |
|                                  | ROS          | NLRP3         | Detrimental | Yes     | No      | Mitophagy impairment in mice exposed to a high-fat diet, correlating with NLRP3 inflammasome activation                          | 31 |
| Obesity                          | mtDNA        | cGAS          | Detrimental | Yes     | No      | Mechanistic link between cGAS activation driven by mtDNA and obesity-related insulin resistance in mice                          | 32 |
|                                  | ROS          | n.d.          | Detrimental | Yes     | No      | Defective mitophagy in <i>Fundc1</i> <sup>-/-</sup> mice aggravates obesity-related insulin resistance                           | 33 |
| Ovarian cancer                   | mtDNA        | n.d.          | Detrimental | No      | Yes     | mtDNA levels in ascites inversely correlate with progression-free survival                                                       | 34 |
| <i>P. aeruginosa</i> infection   | mtDNA        | NLRC4         | Detrimental | Partial | No      | Pathogenic NLRC4 activation under tonic inhibition by autophagy in a mouse model of intraperitoneal infection                    | 35 |
| Pancreatic cancer                | ROS          | AIM2          | Detrimental | Yes     | Yes     | Mitophagy dysfunction accelerates spontaneous pancreatic oncogenesis in mice via mitochondrial iron accumulation and AIM2        | 36 |

|                              |                                    |              |             |         |         |                                                                                                                                                                                                        |    |
|------------------------------|------------------------------------|--------------|-------------|---------|---------|--------------------------------------------------------------------------------------------------------------------------------------------------------------------------------------------------------|----|
| Parkinson's disease          | mtDNA                              | cGAS         | Detrimental | Yes     | Yes     | STING1-dependent loss of dopaminergic neurons from the substantia nigra in mice with <i>Prkn</i> deletion, and high cytokine levels in humans with <i>PRKN</i> mutations                               | 37 |
|                              | mtDNA                              | n.d.         | Detrimental | No      | Yes     | Increased cytokine and mtDNA levels in patients with biallelic or heterozygous <i>PRKN</i> or <i>PINK1</i> mutations                                                                                   | 38 |
|                              | n.d.                               | n.d.         | Detrimental | Partial | No      | Mitochondrial dysfunction in the brain of <i>Prkn</i> <sup>-/-</sup> mice correlating with hindlimb defects and neuronal loss                                                                          | 39 |
|                              | n.d.                               | NLRP3        | Detrimental | Yes     | Partial | Accrued NLRP3 activation in mice and patients bearing <i>PRKN</i> or <i>PINK1</i> defects                                                                                                              | 40 |
| Rhabdomyolysis               | mtDNA                              | TLR9         | Detrimental | No      | Partial | Signs of dysfunctional mitophagy in primary myoblasts from patients with recurrent rhabdomyolysis                                                                                                      | 41 |
| Rheumatoid arthritis         | mtDNA                              | cGAS         | Detrimental | Yes     | No      | TNF blocks <i>PINK1</i> -dependent mitophagy hence promoting type I interferon secretion via cGAS                                                                                                      | 42 |
|                              | Cytochrome <i>c</i>                | TLR4         | Detrimental | Partial | Partial | Pathogenic effects of intra-articular cytochrome <i>c</i> administration but paradoxical reduction of circulating and intra-articular cytochrome <i>c</i> levels in patients with rheumatoid arthritis | 43 |
| SARS-CoV-2                   | mtDNA                              | cGAS         | Detrimental | Yes     | Yes     | Pathogenic cGAS activation in mice and human lung tissues with extensive damage from infection                                                                                                         | 44 |
|                              | mtDNA                              | TLR9         | Detrimental | Yes     | Yes     | Increased levels of circulating mtDNA in patients with COVID-19, and pathogenic TLR9 signalling in mice                                                                                                | 45 |
| Septic shock                 | mtDNA<br>ROS                       | NLRP3        | Detrimental | Yes     | Yes     | Autophagy defects linked to accrued NLRP3 activation and mortality in mice, and increased IL-18 levels in septic vs non-septic patients admitted to the ICU                                            | 46 |
|                              | <i>N</i> -formyl peptides          | FPR1         | Detrimental | No      | Yes     | High circulating levels of <i>N</i> -formyl peptides are associated with increased risk for secondary infection and mortality                                                                          | 47 |
| SFTS                         | mtDNA                              | NLRP3        | Detrimental | Yes     | Yes     | Pathogenic NLRP3 signalling in mice and correlation between <i>BAK1</i> levels and disease outcome in patients                                                                                         | 48 |
| Sickle cell disease          | Haem                               | TLR4         | Detrimental | Yes     | No      | Evidence of haem-driven TLR4-dependent and TLR4-independent vaso-occlusion in mice                                                                                                                     | 49 |
| SIRS                         | mtDNA<br><i>N</i> -formyl peptides | TLR9<br>FPR1 | Detrimental | Yes     | Yes     | Evidence of lung injury in rats administered with mitochondrial DAMPs and elevated blood levels of mtDNA in patients with SIRS                                                                         | 50 |
| Systemic lupus erythematosus | mtDNA                              | AGER<br>TLR9 | Detrimental | No      | Yes     | Extracellular TFAM- or HMGB1-bound mtDNA linked to exacerbated inflammation                                                                                                                            | 51 |
|                              | mtDNA                              | cGAS         | Detrimental | No      | Yes     | Dysfunctional mitophagy leads to pathogenic mitochondrial accumulation in red blood cells                                                                                                              | 52 |
|                              | mtDNA<br>ROS                       | cGAS         | Detrimental | Yes     | Yes     | Mitochondrial ROS and oxidized mtDNA promote NET extrusion by neutrophils                                                                                                                              | 53 |
|                              | mtDNA                              | n.d.         | Detrimental | Partial | Yes     | Pathogenic role for mtDNA released from platelets                                                                                                                                                      | 54 |
|                              | mtDNA                              | n.d.         | Detrimental | No      | Yes     | Oxidized mtDNA escaping degradation and accumulating in the extracellular environment promotes neutrophil activation                                                                                   | 55 |
|                              | mtDNA                              | n.d.         | Detrimental | Yes     | Yes     | VDAC dependent mtDNA release and ROS production support pathogenic NETosis                                                                                                                             | 56 |

\*Limited to studies providing mechanistic evidence *in vivo* or patient data.

AGER, advanced glycosylation end-product specific receptor; AIM2, absent in melanoma 2; ARDS, acute respiratory distress syndrome; BAK1, BCL2 antagonist/killer 1; CASP9, caspase 9; cGAMP, cyclic GMP–AMP; cGAS, cyclic GMP–AMP synthase; COPD, chronic obstructive pulmonary disease; DAMP, damage-associated molecular pattern; FPR1, formyl peptide receptor 1; FUNDC1, FUN14 domain-containing protein 1; HMGB1, high mobility group box 1; ICU, intensive care unit; MAVS, mitochondrial antiviral signalling protein; MOMP, mitochondrial outer membrane permeabilization; mtDAMP, mitochondrial DAMP; mtDNA, mitochondrial DNA; n.d., not determined; NET, neutrophil extracellular trap; NIK, official name mitogen-activated protein kinase kinase kinase 14 (MAP3K14); NLRC4, NLR family CARD containing 4; NLRP3, NLR family, pyrin domain containing 3; OPTN, optineurin; PINK1, PTEN-induced putative kinase 1; PRKN, parkin RBR E3 ubiquitin protein ligase; PRR, pattern recognition receptor; ROS, reactive oxygen species; SIRS, systemic inflammatory response syndrome; SFTS, severe fever with thrombocytopenia syndrome; SMAC, official name diablo IAP-binding mitochondrial protein (DIABLO); STING1, stimulator of interferon response cGAMP interactor 1; TFAM, transcription factor A, mitochondrial; TLR, Toll-like receptor; TNF, tumour necrosis factor; VDAC, voltage-dependent anion channel.

## References

- 1 Maekawa, H. *et al.* Mitochondrial Damage Causes Inflammation via cGAS-STING Signaling in Acute Kidney Injury. *Cell Rep.* **29**, 1261-1273.e1266 (2019).
- 2 Tang, C. *et al.* PINK1-PRKN/PARK2 pathway of mitophagy is activated to protect against renal ischemia-reperfusion injury. *Autophagy* **14**, 880-897 (2018).
- 3 Marques, P. E. *et al.* Chemokines and mitochondrial products activate neutrophils to amplify organ injury during mouse acute liver failure. *Hepatology* **56**, 1971-1982 (2012).
- 4 Roca-Agujetas, V. *et al.* Cholesterol alters mitophagy by impairing optineurin recruitment and lysosomal clearance in Alzheimer's disease. *Mol. Neurodegener.* **16**, 15 (2021).
- 5 Fang, E. F. *et al.* Mitophagy inhibits amyloid- $\beta$  and tau pathology and reverses cognitive deficits in models of Alzheimer's disease. *Nat. Neurosci.* **22**, 401-412 (2019).
- 6 Yu, C. H. *et al.* TDP-43 Triggers Mitochondrial DNA Release via mPTP to Activate cGAS/STING in ALS. *Cell* **183**, 636-649 e618 (2020).
- 7 Xian, H. *et al.* Metformin inhibition of mitochondrial ATP and DNA synthesis abrogates NLRP3 inflammasome activation and pulmonary inflammation. *Immunity* **54**, 1463-1477 e1411 (2021).
- 8 Dorward, D. A. *et al.* Novel role for endogenous mitochondrial formylated peptide-driven formyl peptide receptor 1 signalling in acute respiratory distress syndrome. *Thorax* **72**, 928-936 (2017).
- 9 Ghiringhelli, F. *et al.* Activation of the NLRP3 inflammasome in dendritic cells induces IL-1beta-dependent adaptive immunity against tumors. *Nat. Med.* **15**, 1170-1178 (2009).
- 10 Yamazaki, T. *et al.* Mitochondrial DNA drives abscopal responses to radiation that are inhibited by autophagy. *Nat. Immunol.* **21**, 1160-1171 (2020).
- 11 Rodriguez-Ruiz, M. E. *et al.* Apoptotic caspases inhibit abscopal responses to radiation and identify a new prognostic biomarker for breast cancer patients. *Oncoimmunology* **8**, e1655964 (2019).
- 12 Chung, K. W. *et al.* Mitochondrial Damage and Activation of the STING Pathway Lead to Renal Inflammation and Fibrosis. *Cell Metab.* **30**, 784-799.e785 (2019).
- 13 Michaud, M. *et al.* Autophagy-dependent anticancer immune responses induced by chemotherapeutic agents in mice. *Science* **334**, 1573-1577 (2011).
- 14 Han, C. *et al.* Tumor cells suppress radiation-induced immunity by hijacking caspase 9 signaling. *Nat. Immunol.* **21**, 546-554 (2020).

- 15 Giampazolias, E. *et al.* Mitochondrial permeabilization engages NF-kappaB-dependent anti-tumour activity under caspase deficiency. *Nat. Cell Biol.* **19**, 1116-1129 (2017).
- 16 Giordano, L. *et al.* Extracellular Release of Mitochondrial DNA: Triggered by Cigarette Smoke and Detected in COPD. *Cells* **11**, 369 (2022).
- 17 Wiegman, C. H. *et al.* Oxidative stress-induced mitochondrial dysfunction drives inflammation and airway smooth muscle remodeling in patients with chronic obstructive pulmonary disease. *J. Allergy Clin. Immunol.* **136**, 769-780 (2015).
- 18 Khaloian, S. *et al.* Mitochondrial impairment drives intestinal stem cell transition into dysfunctional Paneth cells predicting Crohn's disease recurrence. *Gut* **69**, 1939-1951 (2020).
- 19 Jackson, D. N. *et al.* Mitochondrial dysfunction during loss of prohibitin 1 triggers Paneth cell defects and ileitis. *Gut* **69**, 1928-1938 (2020).
- 20 Chen, K. *et al.* Optineurin inhibits NLRP3 inflammasome activation by enhancing mitophagy of renal tubular cells in diabetic nephropathy. *Faseb J.* **33**, 4571-4585 (2019).
- 21 Moriyama, M., Koshihara, T. & Ichinohe, T. Influenza A virus M2 protein triggers mitochondrial DNA-mediated antiviral immune responses. *Nat. Commun.* **10**, 4624 (2019).
- 22 Dorflinger, B. *et al.* Mitochondria supply sub-lethal signals for cytokine secretion and DNA-damage in *H. pylori* infection. *Cell Death Differ.* <https://doi.org/10.1038/s41418-022-01009-9> (2022).
- 23 Oka, T. *et al.* Mitochondrial DNA that escapes from autophagy causes inflammation and heart failure. *Nature* **485**, 251-255 (2012).
- 24 Bao, D. *et al.* Mitochondrial fission-induced mtDNA stress promotes tumor-associated macrophage infiltration and HCC progression. *Oncogene* **38**, 5007-5020 (2019).
- 25 Liu, Y. *et al.* Hypoxia induced HMGB1 and mitochondrial DNA interactions mediate tumor growth in hepatocellular carcinoma through Toll-like receptor 9. *J. Hepatol.* **63**, 114-121 (2015).
- 26 Benmerzoug, S. *et al.* STING-dependent sensing of self-DNA drives silica-induced lung inflammation. *Nat. Commun.* **9**, 5226 (2018).
- 27 Lin, S. *et al.* Heme activates TLR4-mediated inflammatory injury via MyD88/TRIF signaling pathway in intracerebral hemorrhage. *J. Neuroinflammation.* **9**, 46 (2012).
- 28 De Leo, M. G. *et al.* Autophagosome-lysosome fusion triggers a lysosomal response mediated by TLR9 and controlled by OCRL. *Nat. Cell Biol.* **18**, 839-850 (2016).

- 29 Kuo, C. L. *et al.* Mitochondrial oxidative stress by Lon-PYCR1 maintains an immunosuppressive tumor microenvironment that promotes cancer progression and metastasis. *Cancer Lett.* **474**, 138-150 (2020).
- 30 Xu, L. *et al.* Mitochondrial DNA enables AIM2 inflammasome activation and hepatocyte pyroptosis in nonalcoholic fatty liver disease. *Am. J. Physiol. Gastrointest. Liver Physiol.* **320**, G1034-G1044 (2021).
- 31 Zhang, N. P., Liu, X. J., Xie, L., Shen, X. Z. & Wu, J. Impaired mitophagy triggers NLRP3 inflammasome activation during the progression from nonalcoholic fatty liver to nonalcoholic steatohepatitis. *Lab. Invest.* **99**, 749-763 (2019).
- 32 Bai, J. *et al.* DsbA-L prevents obesity-induced inflammation and insulin resistance by suppressing the mtDNA release-activated cGAS-cGAMP-STING pathway. *Proc. Natl. Acad. Sci. U S A* **114**, 12196-12201 (2017).
- 33 Wu, H. *et al.* Deficiency of mitophagy receptor FUNDC1 impairs mitochondrial quality and aggravates dietary-induced obesity and metabolic syndrome. *Autophagy* **15**, 1882-1898 (2019).
- 34 Singel, K. L. *et al.* Mitochondrial DNA in the tumour microenvironment activates neutrophils and is associated with worse outcomes in patients with advanced epithelial ovarian cancer. *Br. J. Cancer* **120**, 207-217 (2019).
- 35 Jabir, M. S. *et al.* Mitochondrial damage contributes to *Pseudomonas aeruginosa* activation of the inflammasome and is downregulated by autophagy. *Autophagy* **11**, 166-182 (2015).
- 36 Li, C. *et al.* PINK1 and PARK2 Suppress Pancreatic Tumorigenesis through Control of Mitochondrial Iron-Mediated Immunometabolism. *Dev. Cell* **46**, 441-455.e448 (2018).
- 37 Sliter, D. A. *et al.* Parkin and PINK1 mitigate STING-induced inflammation. *Nature* **561**, 258-262 (2018).
- 38 Borsche, M. *et al.* Mitochondrial damage-associated inflammation highlights biomarkers in PRKN/PINK1 parkinsonism. *Brain* **143**, 3041-3051 (2020).
- 39 Noda, S. *et al.* Loss of Parkin contributes to mitochondrial turnover and dopaminergic neuronal loss in aged mice. *Neurobiol. Dis.* **136**, 104717 (2020).
- 40 Mouton-Liger, F. *et al.* Parkin deficiency modulates NLRP3 inflammasome activation by attenuating an A20-dependent negative feedback loop. *Glia* **66**, 1736-1751 (2018).
- 41 Hamel, Y. *et al.* Compromised mitochondrial quality control triggers lipin1-related rhabdomyolysis. *Cell. Rep. Med.* **2**, 100370 (2021).
- 42 Willemsen, J. *et al.* TNF leads to mtDNA release and cGAS/STING-dependent interferon responses that support inflammatory arthritis. *Cell Rep.* **37**, 109977 (2021).



- 43 Pullerits, R., Bokarewa, M., Jonsson, I. M., Verdrengh, M. & Tarkowski, A. Extracellular cytochrome c, a mitochondrial apoptosis-related protein, induces arthritis. *Rheumatology (Oxford)* **44**, 32-39 (2005).
- 44 Domizio, J. D. *et al.* The cGAS-STING pathway drives type I IFN immunopathology in COVID-19. *Nature* **603**, 145-151 (2022).
- 45 Costa, T. J. *et al.* Mitochondrial DNA and TLR9 activation contribute to SARS-CoV-2-induced endothelial cell damage. *Vascul. Pharmacol.* **142**, 106946 (2022).
- 46 Nakahira, K. *et al.* Autophagy proteins regulate innate immune responses by inhibiting the release of mitochondrial DNA mediated by the NALP3 inflammasome. *Nat. Immunol.* **12**, 222-230 (2011).
- 47 Kwon, W. Y. *et al.* Circulating mitochondrial N-formyl peptides contribute to secondary nosocomial infection in patients with septic shock. *Proc. Natl. Acad. Sci. U S A* **118**, e2018538118 (2021).
- 48 Li, S. *et al.* SFTSV Infection Induces BAK/BAX-Dependent Mitochondrial DNA Release to Trigger NLRP3 Inflammasome Activation. *Cell Rep.* **30**, 4370-4385.e4377 (2020).
- 49 Belcher, J. D. *et al.* Heme triggers TLR4 signaling leading to endothelial cell activation and vaso-occlusion in murine sickle cell disease. *Blood* **123**, 377-390 (2014).
- 50 Zhang, Q. *et al.* Circulating mitochondrial DAMPs cause inflammatory responses to injury. *Nature* **464**, 104-107 (2010).
- 51 Tian, J. *et al.* Toll-like receptor 9-dependent activation by DNA-containing immune complexes is mediated by HMGB1 and RAGE. *Nat. Immunol.* **8**, 487-496 (2007).
- 52 Caielli, S. *et al.* Erythroid mitochondrial retention triggers myeloid-dependent type I interferon in human SLE. *Cell* **184**, 4464-4479 e4419 (2021).
- 53 Lood, C. *et al.* Neutrophil extracellular traps enriched in oxidized mitochondrial DNA are interferogenic and contribute to lupus-like disease. *Nat. Med.* **22**, 146-153 (2016).
- 54 Melki, I. *et al.* Platelets release mitochondrial antigens in systemic lupus erythematosus. *Sci. Transl. Med.* **13**, eaav5928 (2021).
- 55 Caielli, S. *et al.* Oxidized mitochondrial nucleoids released by neutrophils drive type I interferon production in human lupus. *J. Exp. Med.* **213**, 697-713 (2016).
- 56 Kim, J. *et al.* VDAC oligomers form mitochondrial pores to release mtDNA fragments and promote lupus-like disease. *Science* **366**, 1531-1536 (2019).
